# Supplementary material for: Design of S–S bond containing maleimide-conjugatedcloso-dodecaborate (SSMID): identification of unique modification sites on albumin and investigation of intracellular uptake
Source: Royal Society of Chemistry journal article supplement (doi:10.1039/c9ob00584f), 2019-01-01

## Supporting Information

### Design of S-S Bond Containing Maleimide-Conjugated *closo*-Dodecaborate (SSMID): Identification of Its Unique Modification Sites on Albumin and Investigation of Intracellular Uptake

Satomu Ishii,<sup>a,b</sup> Shinichi Sato,<sup>a</sup> Hiroya Asami,<sup>c</sup> Tomoko Hasegawa,<sup>c</sup> Jun-ya Kohno<sup>c</sup> and Hiroyuki Nakamura<sup>a,\*</sup>

<sup>a</sup> Laboratory for Chemistry and Life Science, Institute of Innovative Research, Tokyo Institute of Technology, 4259, Nagatsuta-cho, Midori-ku, Yokohama, 226-8503, Japan.

<sup>b</sup> School of Life Science and Technology, Tokyo Institute of Technology, 4259, Nagatsuta-cho, Midori-ku, Yokohama, 226-8503, Japan.

<sup>c</sup> Department of Chemistry, Faculty of Science, Gakushuin University, 1-5-1 Mejiro, Toshima-ku, Tokyo 171-8588, Japan.

#### Table of Contents

|                                                                                                    |      |
|----------------------------------------------------------------------------------------------------|------|
| Figure S1. Modification of transferrin, avidin and streptavidin by MID or SSMID                    | S-2  |
| Figure S2. Western blot analysis of MID (1) and SSMID (2) conjugation to BSA.                      | S-3  |
| Figure S3. Protein sequence coverage of BSA obtained by LC-MALDI analysis                          | S-4  |
| Figure S4. MS/MS analysis of modified peptide fragment containing Lys211                           | S-5  |
| Figure S5. MS/MS analysis of modified peptide fragment containing Lys413                           | S-6  |
| Figure S6. MS/MS analysis of modified peptide fragment containing Lys431                           | S-7  |
| Figure S7. Lysine residue corresponding BSA Lys211 in warfarin binding site of HSA                 | S-8  |
| Figure S8. Lysine residues corresponding to BSA Lys413 and Lys431 in ibuprofen binding site of HSA | S-8  |
| 1. General procedure for the synthesis of SSMID                                                    | S-9  |
| 2. Protein modification with MID or SSMID                                                          | S-11 |
| 3. Western blot detection of boron conjugated albumin                                              | S-12 |
| 4. Blocking experiment of albumin                                                                  | S-12 |
| 5. In-gel digestion for mass spectrometric characterization of SSMID-protein conjugates            | S-12 |
| 6. Immunocytochemical study (ICC) of boron conjugated albumin                                      | S-13 |
| 7. References                                                                                      | S-13 |
| 8. NMR spectral data                                                                               | S-14 |

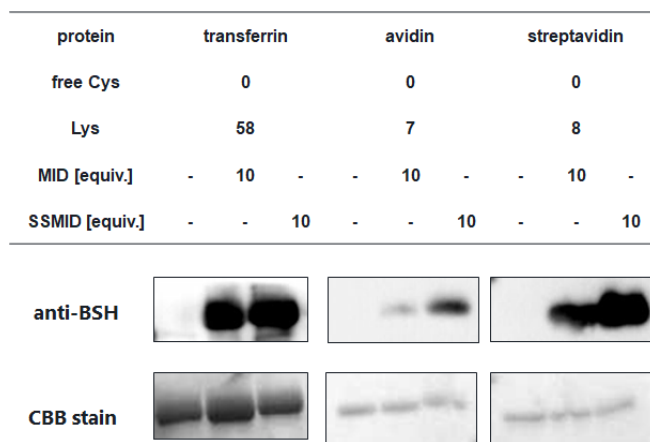

**Figure S1.** Modification of transferrin, avidin and streptavidin by MID or SSMID.

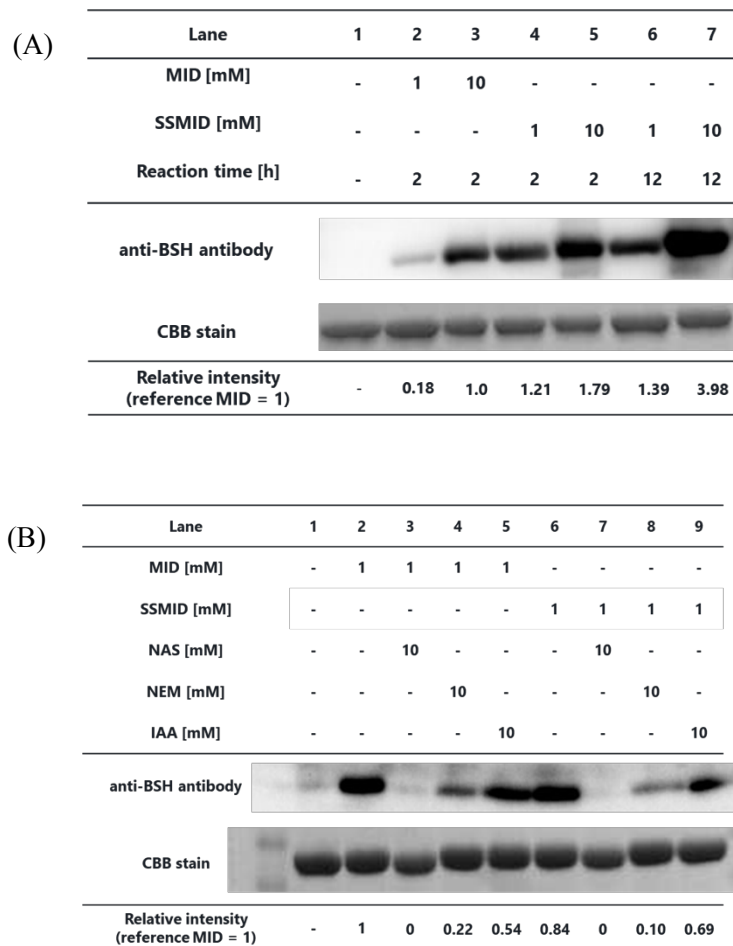

**Figure S2.** Western blot analysis of MID (1) and SSMID (2) conjugation to BSA. (A) Concentration- and reaction time-dependent conjugation efficacy; (B) Conjugation efficacy of MID and SSMID to BSA pretreated with capping agents: *N*-acetyl succinimide (NAS), *N*-ethylmaleimide (NEM), and 2-iodoacetamide (IAA). BSA (1 mM) was used for all experiments.

**MATRIX SCIENCE MASCOT Search Results**

**Protein View: ALBU\_BOVIN**

Serum albumin OS=Bos taurus GN=ALB PE=1 SV=4

Database: SwissProt  
 Score: 63  
 Expect: 0.0063  
 Nominal mass (M<sub>r</sub>): 69248  
 Calculated pI: 5.82  
 Taxonomy: [Bos taurus](#)

Sequence similarity is available as [an NCBI BLAST search of ALBU\\_BOVIN against nr.](#)

**Search parameters**

Enzyme: Trypsin: cuts C-term side of KR unless next residue is P.  
 Variable modifications: [Carbamidomethyl \(C\)](#), [Oxidation \(HW\)](#), [Oxidation \(M\)](#), [NakamuraLab\\_SSMIDIAA\(C\) \(C\)](#), [NakamuraLab\\_SSMIDIAA\(K\) \(K\)](#)  
 Mass values searched: 100  
 Mass values matched: 62

**Protein sequence coverage: 79%**

Matched peptides shown in **bold red**.

```

1 MKWVTFISLL LLFSSAYSRG VFRRDTHKSE IAHRFKDLGE EHFKGLVLIA
51 FSQYLQQCPF DEHVKLWNEL TEFAKTCVAD ESHAGCEKSL HTLFGDELCK
101 VASLRETYGD MADCCCKQEP ERNECFLSHK DDSPDLPKLK PDPNTLCDEF
151 KADEKCFWKG YLYEIARRHP YFYAPELLYY ANKNGVFQE CCQAEDKGAC
201 LLPKIETMRE KVLASSARQR LRCASIQKFG ERALKAWSVA RLSQKFPKAE
251 FVEVTKLVTD LTKVHKECCH GDLLCADDR ADLAKYICDN QDTISSKLRK
301 CCDKPLLEKS HCIAEVEKDA IPENLPLTA DFAEDKDVCCK NYQEAKDAPL
351 GSFLYEYSRR HPEYAVSVLL RLAKYEATL EECCKADDPH ACYSTVFDKDL
401 KHLVDEPQNL IKQNCDFQEK LGEYGFQNAL IVRYTRKVPQ VSTPTLVEVS
451 RSLGKVGTRC CTKPESERMP CTEDYLSLIL NRLCVLHEKT PVSEKVTKCC
501 TESLVNRRPC FSALTFDETY VPKAFDEKLF TFHADICTLP DTEKQIKKQT
551 ALVELLKHKP KATEEQLRKV MENFVAFVDR CCAADDKEAC FAVEGPKLVV
601 STQTALA
    
```

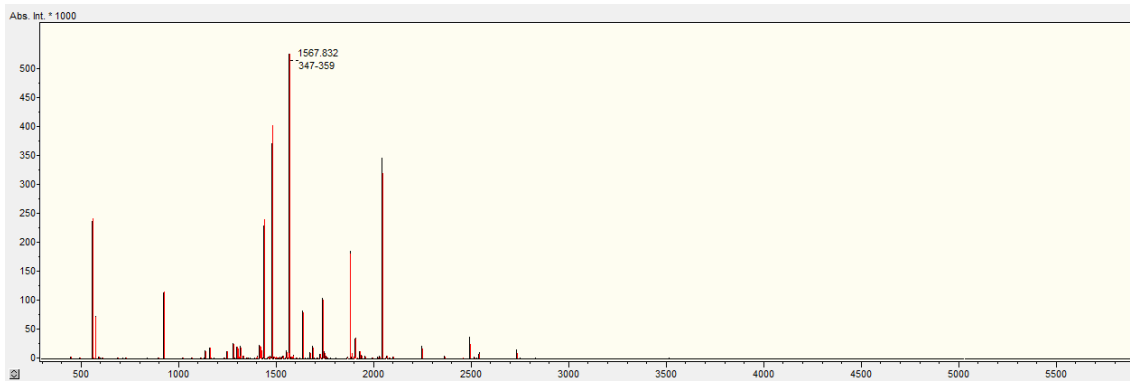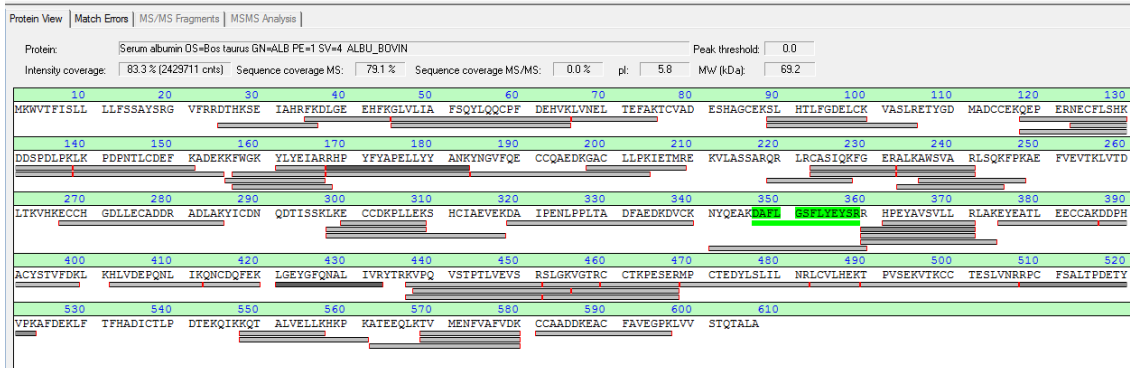

Figure S3. Protein sequence coverage of BSA obtained by LC-MALDI analysis

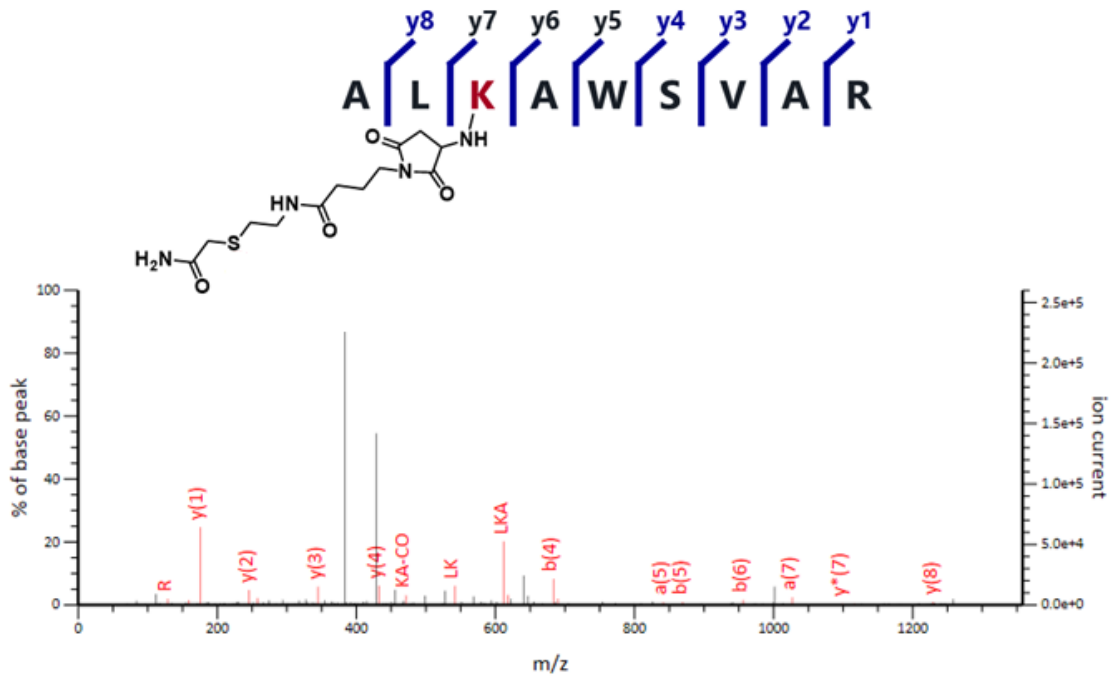

| # | Immon.   | a         | a*        | a <sup>0</sup> | b         | b*        | b <sup>0</sup> | d         | Seq. | v         | w         | y         | y*        | y <sup>0</sup> | # |
|---|----------|-----------|-----------|----------------|-----------|-----------|----------------|-----------|------|-----------|-----------|-----------|-----------|----------------|---|
| 1 | 44.0495  | 44.0495   |           |                | 72.0444   |           |                | 44.0495   | A    |           |           |           |           |                | 9 |
| 2 | 86.0964  | 157.1335  |           |                | 185.1285  |           |                | 115.0866  | L    | 1171.5677 | 1170.5724 | 1229.6459 | 1212.6194 | 1211.6354      | 8 |
| 3 | 400.2013 | 584.3225  | 567.2959  |                | 612.3174  | 595.2908  |                | 228.1707  | K    | 744.3787  | 743.3835  | 1116.5619 | 1099.5353 | 1098.5513      | 7 |
| 4 | 44.0495  | 655.3596  | 638.3330  |                | 683.3545  | 666.3280  |                |           | A    | 673.3416  |           | 689.3729  | 672.3464  | 671.3624       | 6 |
| 5 | 159.0917 | 841.4389  | 824.4124  |                | 869.4338  | 852.4073  |                |           | W    | 487.2623  |           | 618.3358  | 601.3093  | 600.3253       | 5 |
| 6 | 60.0444  | 928.4709  | 911.4444  | 910.4604       | 956.4658  | 939.4393  | 938.4553       | 912.4760  | S    | 400.2303  | 399.2350  | 432.2565  | 415.2300  | 414.2459       | 4 |
| 7 | 72.0808  | 1027.5393 | 1010.5128 | 1009.5288      | 1055.5343 | 1038.5077 | 1037.5237      | 1013.5237 | V    | 301.1619  | 314.1823  | 345.2245  | 328.1979  |                | 3 |
| 8 | 44.0495  | 1098.5765 | 1081.5499 | 1080.5659      | 1126.5714 | 1109.5448 | 1108.5608      |           | A    | 230.1248  |           | 246.1561  | 229.1295  |                | 2 |
| 9 | 129.1135 |           |           |                |           |           |                |           | R    | 74.0237   | 73.0284   | 175.1190  | 158.0924  |                | 1 |

Figure S4. MS/MS analysis of modified peptide fragment containing Lys211.

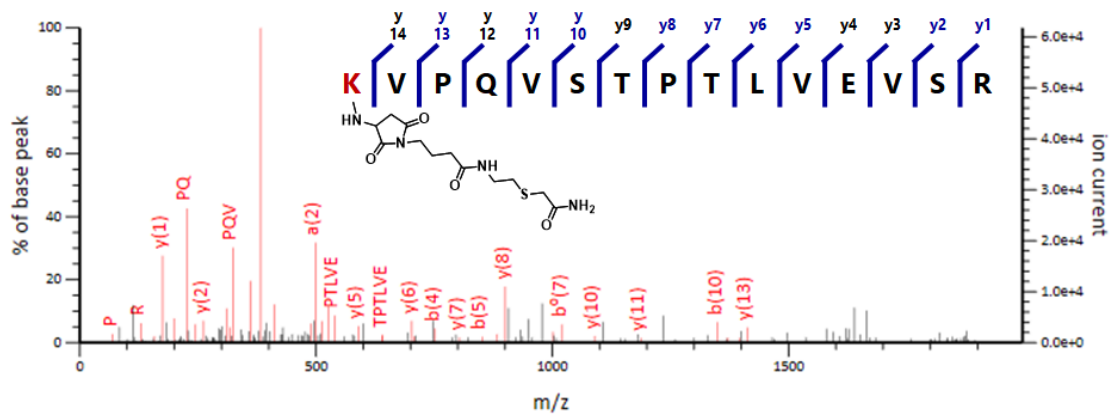

| #  | Immon.   | a         | a*        | a <sup>0</sup> | b         | b*        | b <sup>0</sup> | d         | d'        | Seq. | v         | w         | w'       | y         | y*        | y <sup>0</sup> | #  |
|----|----------|-----------|-----------|----------------|-----------|-----------|----------------|-----------|-----------|------|-----------|-----------|----------|-----------|-----------|----------------|----|
| 1  | 400.2013 | 400.2013  | 383.1748  |                | 428.1962  | 411.1697  |                | 44.0495   |           | K    |           |           |          |           |           |                | 15 |
| 2  | 72.0808  | 499.2697  | 482.2432  |                | 527.2646  | 510.2381  |                | 485.2541  |           | V    | 1467.7802 | 1480.8006 |          | 1511.8428 | 1494.8162 | 1493.8322      | 14 |
| 3  | 70.0651  | 596.3225  | 579.2959  |                | 624.3174  | 607.2908  |                | 570.3068  |           | P    | 1370.7274 | 1369.7322 |          | 1412.7744 | 1395.7478 | 1394.7638      | 13 |
| 4  | 101.0709 | 724.3811  | 707.3545  |                | 752.3760  | 735.3494  |                | 667.3596  |           | Q    | 1242.6688 | 1241.6736 |          | 1315.7216 | 1298.6951 | 1297.7110      | 12 |
| 5  | 72.0808  | 823.4495  | 806.4229  |                | 851.4444  | 834.4178  |                | 809.4338  |           | V    | 1143.6004 | 1156.6208 |          | 1187.6630 | 1170.6365 | 1169.6525      | 11 |
| 6  | 60.0444  | 910.4815  | 893.4549  | 892.4709       | 938.4764  | 921.4499  | 920.4658       | 894.4866  |           | S    | 1056.5684 | 1055.5732 |          | 1088.5946 | 1071.5681 | 1070.5841      | 10 |
| 7  | 74.0600  | 1011.5292 | 994.5026  | 993.5186       | 1039.5241 | 1022.4975 | 1021.5135      | 995.5343  | 997.5135  | T    | 955.5207  | 968.5411  | 970.5204 | 1001.5626 | 984.5360  | 983.5520       | 9  |
| 8  | 70.0651  | 1108.5819 | 1091.5554 | 1090.5714      | 1136.5769 | 1119.5503 | 1118.5663      | 1082.5663 |           | P    | 858.4680  | 857.4727  |          | 900.5149  | 883.4884  | 882.5043       | 8  |
| 9  | 74.0600  | 1209.6296 | 1192.6031 | 1191.6191      | 1237.6245 | 1220.5980 | 1219.6140      | 1193.6347 | 1195.6140 | T    | 757.4203  | 770.4407  | 772.4199 | 803.4621  | 786.4356  | 785.4516       | 7  |
| 10 | 86.0964  | 1322.7137 | 1305.6871 | 1304.7031      | 1350.7086 | 1333.6821 | 1332.6980      | 1280.6667 |           | L    | 644.3362  | 643.3410  |          | 702.4145  | 685.3879  | 684.4039       | 6  |
| 11 | 72.0808  | 1421.7821 | 1404.7556 | 1403.7715      | 1449.7770 | 1432.7505 | 1431.7664      | 1407.7664 |           | V    | 545.2678  | 558.2882  |          | 589.3304  | 572.3039  | 571.3198       | 5  |
| 12 | 102.0550 | 1550.8247 | 1533.7981 | 1532.8141      | 1578.8196 | 1561.7931 | 1560.8090      | 1492.8192 |           | E    | 416.2252  | 415.2300  |          | 490.2620  | 473.2354  | 472.2514       | 4  |
| 13 | 72.0808  | 1649.8931 | 1632.8666 | 1631.8825      | 1677.8880 | 1660.8615 | 1659.8775      | 1635.8775 |           | V    | 317.1568  | 330.1772  |          | 361.2194  | 344.1928  | 343.2088       | 3  |
| 14 | 60.0444  | 1736.9251 | 1719.8986 | 1718.9146      | 1764.9200 | 1747.8935 | 1746.9095      | 1720.9302 |           | S    | 230.1248  | 229.1295  |          | 262.1510  | 245.1244  | 244.1404       | 2  |
| 15 | 129.1135 |           |           |                |           |           |                |           |           | R    | 74.0237   | 73.0284   |          | 175.1190  | 158.0924  |                | 1  |

Figure S5. MS/MS analysis of modified peptide fragment containing Lys413.

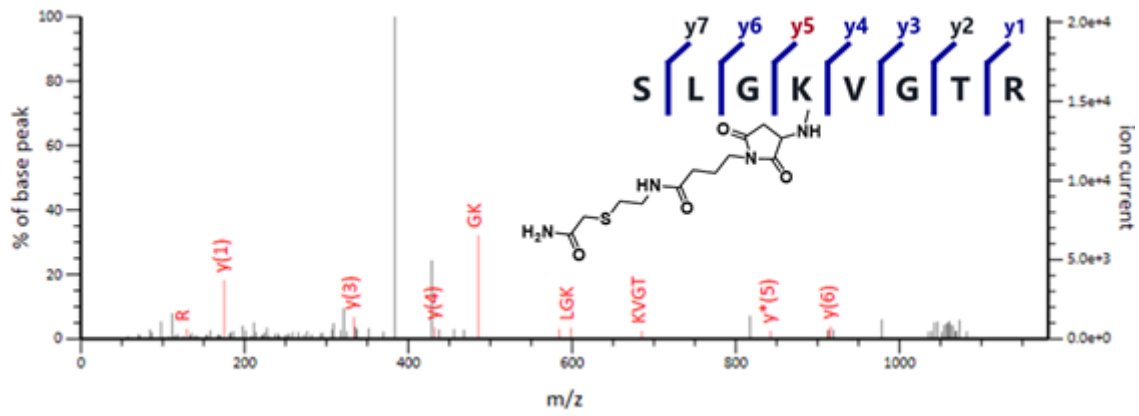

| # | Immon.   | a        | a*       | a <sup>0</sup> | b        | b*       | b <sup>0</sup> | d        | d'       | Seq. | v        | w        | w'       | y         | y*        | y <sup>0</sup> | # |
|---|----------|----------|----------|----------------|----------|----------|----------------|----------|----------|------|----------|----------|----------|-----------|-----------|----------------|---|
| 1 | 60.0444  | 60.0444  |          | 42.0338        | 88.0393  |          | 70.0287        | 44.0495  |          | S    |          |          |          |           |           |                | 8 |
| 2 | 86.0964  | 173.1285 |          | 155.1179       | 201.1234 |          | 183.1128       | 131.0815 |          | L    | 971.4727 | 970.4775 |          | 1029.5510 | 1012.5244 | 1011.5404      | 7 |
| 3 | 30.0338  | 230.1499 |          | 212.1394       | 258.1448 |          | 240.1343       |          |          | G    |          |          |          | 916.4669  | 899.4404  | 898.4563       | 6 |
| 4 | 400.2013 | 657.3389 | 640.3123 | 639.3283       | 685.3338 | 668.3072 | 667.3232       | 301.1870 |          | K    | 487.2623 | 486.2671 |          | 859.4454  | 842.4189  | 841.4349       | 5 |
| 5 | 72.0808  | 756.4073 | 739.3807 | 738.3967       | 784.4022 | 767.3756 | 766.3916       | 742.3916 |          | V    | 388.1939 | 401.2143 |          | 432.2565  | 415.2300  | 414.2459       | 4 |
| 6 | 30.0338  | 813.4287 | 796.4022 | 795.4182       | 841.4236 | 824.3971 | 823.4131       |          |          | G    |          |          |          | 333.1881  | 316.1615  | 315.1775       | 3 |
| 7 | 74.0600  | 914.4764 | 897.4499 | 896.4658       | 942.4713 | 925.4448 | 924.4608       | 898.4815 | 900.4608 | T    | 230.1248 | 243.1452 | 245.1244 | 276.1666  | 259.1401  | 258.1561       | 2 |
| 8 | 129.1135 |          |          |                |          |          |                |          |          | R    | 74.0237  | 73.0284  |          | 175.1190  | 158.0924  |                | 1 |

Figure S6. MS/MS analysis of modified peptide fragment containing Lys431.

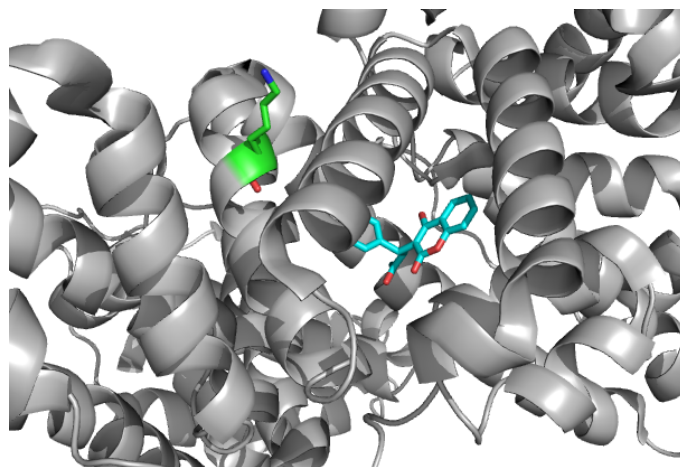

Figure S7. Lysine residue corresponding BSA Lys211 in warfarin binding site of HSA. Lys211 of BSA is conserved in the structure of HSA (HSA Lys212). Green: lysine residue. Blue: warfarin. PDB file: 2BXD.

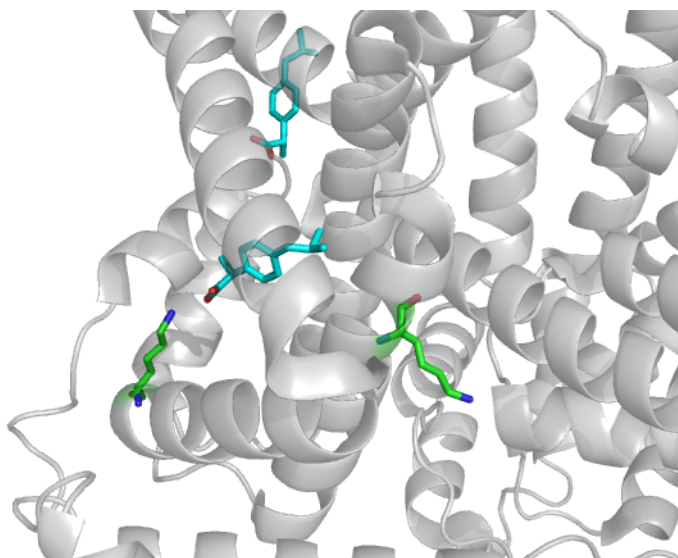

Figure S8. Lysine residues corresponding to BSA Lys413 and Lys431 in ibuprofen binding site of HSA. Lys413 and Lys431 of BSA are conserved in the structure of HSA (HSA Lys414 and Lys432). Green: lysine residues corresponding to BSA Lys413 (left) and Lys431 (right) residue. Blue: ibuprofen. PDB file: 2BXG.



## 1. General procedure for the synthesis of SSMID

NMR spectra were recorded with a Bruker AVANCE-400 (400 MHz for  $^1\text{H}$ ) or ASCEND-500 (500 MHz for  $^1\text{H}$ , 125 MHz for  $^{13}\text{C}$ , 160 MHz for  $^{11}\text{B}$ ) instrument in the indicated solvent.  $^{11}\text{B}$  NMR spectra were obtained by the  $^{11}\text{B}$ - $^1\text{H}$  decoupling method. Chemical shifts are reported in units of parts per million (ppm) relative to the signal ( $\delta = 0.00$  ppm) for internal tetramethylsilane for solutions in  $\text{CDCl}_3$  ( $\delta = 7.26$  ppm for  $^1\text{H}$ ,  $\delta = 77.0$  ppm for  $^{13}\text{C}$ ) or  $\text{CD}_3\text{CN}$  ( $\delta = 1.94$  ppm for  $^1\text{H}$ ,  $\delta = 118.26$  ppm for  $^{13}\text{C}$ ). IR spectra were recorded on a JASCO FT/IR-4200 spectrometer. Only the strongest and/or structurally important peaks are reported as IR data given in  $\text{cm}^{-1}$ . High-resolution mass spectrometry (HRMS) was performed with a Bruker ESI-TOF-MS (micrOTOF II). All reactions were monitored by thin-layer chromatography carried out on 0.2 mm E. Merck silica gel plates (60F-254) with UV light (254 nm), and were visualized using an aqueous alkaline  $\text{KMnO}_4$  solution. Silica gel (Fuji Silysia, CHROMATOREX PSQ60B, 50–200  $\mu\text{m}$ ) was used for column chromatography. All chemicals and purified proteins for biological experiments were obtained from commercial sources and were used without further purification.

### Synthesis of 1,4-dioxane-*closo*-dodecaborate complex (1)

This compound was synthesized according to the literature procedure.[1] Briefly, *closo*-dodecaborate tetrabutylammonium form (1.3 g, 2.0 mmol) converted from the commercially available *closo*-dodecaborate triethylammonium form,  $(\text{Et}_3\text{NH})_2[\text{B}_{12}\text{H}_{12}]$ , by ion-exchange was dissolved in 1,4-dioxane (70 mL) and  $\text{NaBF}_4$  (1.1 g, 10 mmol) and HCl (4 M, 1 mL) were added. The mixture was heated to 100  $^\circ\text{C}$  and stirred for 12 h. After cooling to ambient temperature, the precipitates were removed by filtration and the organic layer was concentrated under reduced pressure. Recrystallization from ethanol gave compound **1** as a white solid (430 mg, 87% yield).  $^1\text{H}$  NMR (400 MHz,  $\text{CD}_3\text{CN}$ )  $\delta$  4.50 (m, 4H), 3.85 (m, 4H), 3.07 (m, 8H), 1.60 (m, 8H), 1.35 (m, 8H), 0.97 (t,  $J = 7.2$  Hz, 12H).

### Synthesis of *N*-*tert*-butoxycarbonylcystamine (2)

This compound was synthesized according to the literature procedure.[2] Briefly, cystamine dihydrochloride (1.00 g, 4.44 mmol) was dissolved in methanol (70 mL) and triethylamine (1.85 mL, 13.33 mmol) was added at 0 $^\circ\text{C}$ . The mixture was stirred for 30 min and then di-*tert*-butyldicarbonate (1.01 mL, 4.44 mmol) was added dropwise at 0 $^\circ\text{C}$ . The reaction mixture was allowed to r.t. and stirred for 5 h. The solvent was evaporated, and 1 N NaOH solution was added (5 mL). The mixture was extracted with  $\text{CH}_2\text{Cl}_2$  (2 x 5 mL) and the combined organic phases

were washed with H<sub>2</sub>O (2 x 5 mL). The organic layer was then dried over MgSO<sub>4</sub> and concentrated in vacuo to yield compound **2** as a white solid (448 mg, 46% yield). <sup>1</sup>H NMR (CDCl<sub>3</sub>) δ 3.45 (m, 2H), 3.00 (t, *J* = 6.16 Hz, 2H), 2.77 (q, *J* = 6.19 Hz, 4H), 1.45 (s, 9H).

### Synthesis of *N*-*tert*-butoxycarbonylcystamine-*closo*-dodecaborate conjugate (**3**)

Compound **1** (471 mg, 1 mmol), *N*-*tert*-butoxycarbonylcystamine **2** (261mg, 1 mmol) and NaHCO<sub>3</sub> (270 mg, 3.2 mmol) were dissolved in dry MeCN (5 mL) and the mixture was stirred under refluxed conditions for 10 h. Inorganic precipitates were filtered and the solvent was removed under reduced pressure. The residue was purified by silica gel column chromatography (CH<sub>2</sub>Cl<sub>2</sub>:MeOH = 10:1) to give compound **3** as a white solid (571 mg, 79% yield). <sup>1</sup>H NMR (400 MHz; CD<sub>3</sub>CN) δ 3.85 (t, *J* = 5.36 Hz, 2H), 3.67 (m, 4H), 3.58 (s, 1H), 3.44 (t, *J* = 7.16 Hz, 2H), 3.37 (q, *J* = 6.48 Hz, 2H), 3.24 (t, *J* = 5.3 Hz, 2H), 3.12 (m, 8H), 2.88 (m, 2H), 2.81 (t, *J* = 6.62 Hz, 1H), 1.63 (m, 8H), 1.44 (s, 9H), 1.38 (m, 8H), 0.99 (t, *J* = 7.34 Hz, 12H). <sup>13</sup>C NMR (125 MHz; CD<sub>3</sub>CN) δ 71.34, 69.05, 68.97, 64.92, 64.78, 58.36, 46.79, 45.73, 39.49, 37.91, 33.07, 27.64, 23.33, 19.34, 12.81. <sup>11</sup>B NMR (160 MHz; CD<sub>3</sub>CN) δ 5.87, -16.77, -17.58, -22.08. IR (ATR, cm<sup>-1</sup>): 2959, 2866, 2463, 1698, 1457, 1380, 1249, 1161, 1047, 1014, 862, 719, 420, 403; HRMS (ESI, negative) *m/z* calcd. for C<sub>29</sub>H<sub>74</sub>B<sub>12</sub>N<sub>3</sub>O<sub>4</sub>S<sub>2</sub> [M]<sup>-</sup>: 722.6334, found: 722.6235. m.p. 96-97 °C.

### Synthesis of tetrabutylammonium form of maleimide-cystamine-*closo*-dodecaborate conjugate (**6**)

Compound **3** (346 mg, 0.55 mmol) was dissolved in CH<sub>3</sub>CN (18 mL) and 4N HCl dioxane (6 mL) was added dropwise at 0 °C. The mixture was stirred at room temperature for 4 h and then TEA was added dropwise. After evaporation, the residue was dissolved in CH<sub>2</sub>Cl<sub>2</sub> and wash with 1 N NaOH. The organic solvents were removed under reduced pressure to give compound crude **4** as a yellow oil (300 mg). Crude **4** (150 mg, 0.24 mmol), 4-maleimidobutyric acid **5** (53 mg, 0.29 mmol), (benzotriazol-1-yloxy)-tris(dimethylamino)phosphonium hexafluorophosphate (BOP; 106 mg, 0.24 mmol), NaHCO<sub>3</sub> (65 mg, 0.77 mmol) were dissolved in CH<sub>2</sub>Cl<sub>2</sub> and stirred at room temperature for overnight. The reaction mixture was washed 3 times with 1N HCl solution followed by 3 times with brine and then concentrated under the reduced pressure. The residue was purified by silica gel column chromatography (CH<sub>2</sub>Cl<sub>2</sub>:MeOH = 20:1 to 10:1) to give

compound **6** as a white amorphous (115 mg, 2 steps 60% yield).  $^1\text{H}$  NMR (400 MHz;  $\text{CD}_3\text{CN}$ )  $\delta$  6.77 (s, 2H), 3.85 (t,  $J = 5.38$  Hz, 3H), 3.68- 3.64 (m, 6H), 3.51-3.42 (m, 9H), 3.24 (t,  $J = 5.32$  Hz, 3H), 3.11-3.05 (m, 8H), 2.89 (t,  $J = 6.60$  Hz, 2H), 1.84 (m, 4H), 1.63 (m, 8H), 1.44 (m, 8H), 0.99 (t,  $J = 7.34$  Hz, 12H).  $^{13}\text{C}$  NMR (125 MHz;  $\text{D}_2\text{O}$ )  $\delta$  173.24, 172.26, 172.20, 172.10, 135.16, 73.4, 73.09, 72.19, 71.90, 69.76, 69.69, 69.13, 68.46, 67.87, 59.27, 59.25, 59.22, 53.51, 49.81, 49.04, 48.44, 47.63, 47.32, 46.76, 46.65, 39.28, 39.05, 38.95, 37.96, 37.90, 36.62, 35.84, 33.75, 33.71, 33.50, 30.86, 30.68, 25.16, 25.14, 24.67, 24.55, 24.25, 20.25, 20.24, 13.75.  $^{11}\text{B}$  NMR (160 MHz;  $\text{D}_2\text{O}$ )  $\delta$  6.19, -16.75, -17.71, -22.36. IR (ATR,  $\text{cm}^{-1}$ ): 2959, 2929, 2872, 2465, 1702, 1635, 1457, 1407, 1378, 1281, 1140, 1106, 1046, 1015, 880, 829, 718, 694; HRMS (ESI, negative)  $m/z$  calcd. for  $\text{C}_{16}\text{H}_{37}\text{B}_{12}\text{N}_3\text{O}_5\text{S}_2\text{Na} [\text{M}]^-$ : 568.3268, found: 568.3274.

### **Synthesis of tetramethylammonium form of maleimide-cystamine-*closo*-dodecaborate conjugate (SSMID)**

Compound **6** (115 mg, 0.14 mmol) was dissolved in methanol/ethanol (1/1; 5 mL) and a solution of tetramethylammonium (TMA) chloride (77 mg, 0.7 mmol) in 2 mL (methanol/ethanol = 1/1) was added. SSMID was precipitated as a white solid (42 mg, 42%):  $^1\text{H}$  NMR (500 MHz;  $\text{CD}_3\text{CN}$ ):  $\delta$  7.31 (d,  $J = 8.0$  Hz, 2H), 7.11 (d,  $J = 8.4$  Hz, 2H), 3.75-3.70 (m, 1H), 3.54-3.52 (m, 2H), 3.51-3.42 (m, 4H), 3.30-3.24 (m, 2H), 3.23 (s, 12H), 2.46 (d,  $J = 7.2$  Hz, 2H), 1.88-1.82 (m, 1H), 1.38 (d,  $J = 6.8$  Hz, 4H), 0.90 (d,  $J = 6.4$  Hz, 6H);  $^{13}\text{C}$  NMR (125 MHz;  $\text{D}_2\text{O}$ )  $\delta$  172.04, 170.93, 169.59, 163.26, 135.21, 59.31, 59.29, 59.26, 37.27, 36.50, 31.24, 28.84, 26.31, 24.27, 24.25, 20.27, 13.75;  $^{11}\text{B}$  NMR (160 MHz;  $\text{D}_2\text{O}$ )  $\delta$  6.74, -16.77, -17.58, -22.14. IR (ATR,  $\text{cm}^{-1}$ ): 2925, 2468, 1700, 1635, 1485, 1445, 1118, 1049, 1017, 948, 822, 719, 694, 455, 418; HRMS (ESI, negative)  $m/z$  calcd. for  $\text{C}_{16}\text{H}_{38}\text{B}_{12}\text{N}_3\text{O}_5\text{S}_2 [\text{M}]^-$ : 546.3459, found: 546.3394. m.p. 244-246 °C.

## **2. Protein modification with MID or SSMID**

For the modification with MID or SSMID, a solution of BSA (final concentration 100  $\mu\text{M}$ ) in PBS buffer was added MID (final concentration 10 mM). The solution was briefly vortexed and incubated at room temperature for 12 h. The mixture was added 5 $\times$ SDS-PAGE sample buffer, boiled at 95 °C for 5 min and subjected to SDS-polyacrylamide gel (10% acrylamide) electrophoresis (PAGE). The gel was stained by CBB and obtained image with a Molecular Imager ChemiDoc XRS (Bio Rad).

### **3. Western blot detection of boron conjugated albumin**

Acrylamide gel which obtained by SDS-PAGE was transferred to polyvinylidene difluoride (PVDF) membrane (GE Healthcare), blocked with Immuno Block (DS Pharma) for 1 h. The membrane was washed by TTBS (Tween-Tris buffered saline) for 10 min in 3 times. The resulting membrane was treated with anti-B<sub>12</sub> cluster (B<sub>12</sub>H<sub>11</sub>SH, BSH) antibody (1000 times diluted) at the condition of 4 °C for 12 h. HRP-conjugated secondary antibody (anti-mouse-HRP, Santa Cruz, 3000 times diluted) was treated at room temperature for 1 h, then washed by TTBS buffer for 10 min in 3 times. The chemiluminescence images were obtained by Fusion Solo 4S (Vilber Lourmat) after added detection reagent Luminata™ Forte (Millipore) or ImmunoStar LD (Wako Pure Chemical Industries, Ltd.).

### **4. Blocking experiment of albumin**

To a solution of BSA (final concentration 100 μM) or BSA, which was capped with 10 mM NEM or NAS on ahead, in 10 mM PBS buffer for 1h was added MID or SSMID (final concentration 10 mM). The solution was briefly vortexed and incubated at room temperature for 12 h. The mixture was boiled for 5 min and subjected to SDS-polyacrylamide gel (10% acrylamide) electrophoresis (PAGE).

### **5. In-gel digestion for mass spectrometric characterization of SSMID-protein conjugates**

The entire acrylamide gel was rinsed with ultrapure water for a few hours, and bands (spots) of interest were excised with a clean scalpel. The gel pieces cut into a cube size was transferred to a tube and they were washed with ultrapure water for 10 minutes three times. The gels pieces were treated with 100 μL of 100 mM ammonium bicarbonate/acetonitrile (1:1, vol/vol) solution and incubate tubes for 10 min at 37 °C. The supernatant was removed and the gels were treated with 100 μL of 100 mM ammonium bicarbonate solution and incubate tubes for 10 min. The supernatant was removed and the gels were treated with 100 μL of 100 mM ammonium bicarbonate/acetonitrile (1:1, vol/vol) solution and incubate tubes for 10 min at 37 °C. The supernatant was removed and the gels were treated with 50 μL of acetonitrile and incubate tubes at 37°C until gel pieces become white and shrink. The shrunk gels pieces were treated with 50 μL of 100 mM DTT / 100 mM ammonium bicarbonate solution, vortex briefly and incubate tubes for 30 min at 37 °C. The tubes were cooled down to room temperature and the supernatant was

removed completely. For capping free SH groups, 50  $\mu\text{L}$  of 100 mM iodoacetamide / 100 mM ammonium bicarbonate solution was added and incubated for 30 min at room temperature in the dark. The gels pieces were washed with 100  $\mu\text{L}$  of 100 mM ammonium bicarbonate solution and 100  $\mu\text{L}$  of 100 mM ammonium bicarbonate/acetonitrile (1:1, vol/vol) solution. The gel pieces were shrunk with acetonitrile. A solution of trypsin in Tris buffer (pH 8.0) were added to the dry gel pieces. The samples were incubated overnight at 37°C. The digestion was quenched with adding TFA (final 0.1 %), and the samples were desalinated through Cleanup C18 Pipette Tips (Agilent). The solution (2  $\mu\text{L}$ ) were mixed on MALDI plate mix with 1  $\mu\text{L}$  of CHCA.

### **6. Immunocytochemical study (ICC) of boron conjugated albumin**

Cells were seeded at a density of  $3 \times 10^5$  cells/ml with media 0.1 mL on the cover glasses in 6 well plate dishes, and incubated for 12h. Solution of MID-conjugated albumin (100 ppm boron concentration) was added and the cells were incubated for 6 hours. The cells were washed three times in the dish with 1 mL of PBS buffer, fixed with 4% paraformaldehyde (PFA) for 10 min, and treated with 0.4 % TritonX for 5 min. Added the anti-MID antibody (Rabbit polyclonal antibody against MID was produced by Scrum Inc.) 500 times diluted by Can get signal solution B (TOYOBO Inc.) at the condition of 4 °C for overnight, the cells were washed three times in the dish with 1 mL of PBS buffer. Added the FITC-conjugated secondary antibody (anti-Rabbit-FITC) 500 times diluted at the condition of 4 °C for 2 h. The cells were washed with PBS buffer three times. Nuclei were counterstained with DAPI. Fluorescence signals were observed using a confocal laser microscope (LMS780 spectral confocal system, Zeiss).

### **7. References**

- [1] I. B. Sivaev, N. Y. Kulikova, E. A. Nizhnik, M. V. Vichuzhanin, Z. A. Starikova, A. A. Semioshkin and V. I. Bregadze, *J. Organomet. Chem.*, 2008, **693**, 519-525.
- [2] R. R. Castillo, D. Lozano and M. Vallet-Regi, *Bioconjug. Chem.*, 2018, **29**, 3677-3685.

## 8. NMR Spectral data

### 1,4-Dioxane-*closo*-dodecaborate complex: <sup>1</sup>H-NMR (500 MHz, CD<sub>3</sub>CN)

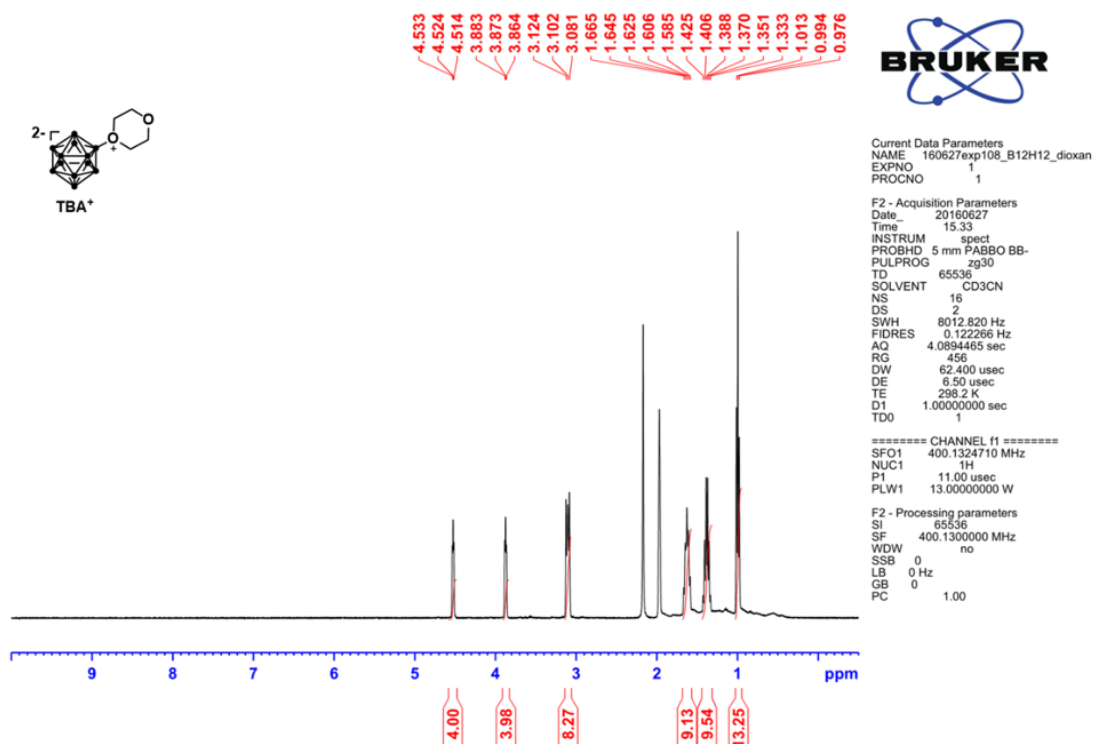

### *N*-*tert*-butoxycarbonylcystamine (2): <sup>1</sup>H-NMR (500 MHz, CD<sub>3</sub>CN)

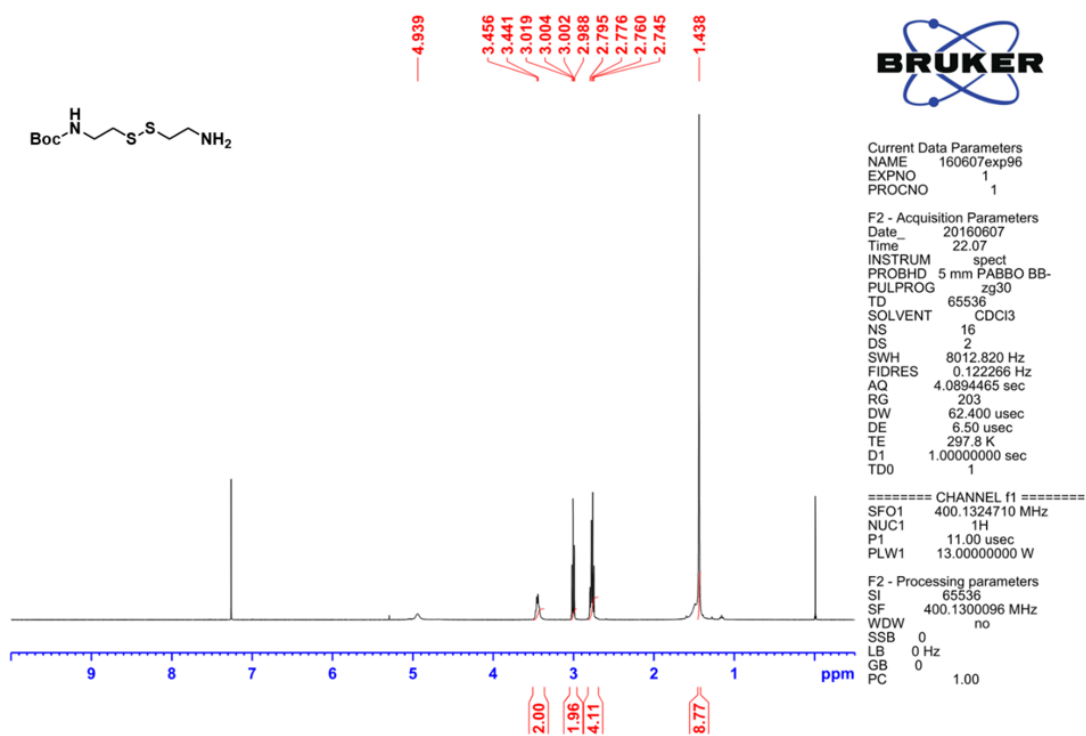

### *N*-*tert*-butoxycarbonylcystamine-*closo*-dodecaborate conjugate (3)

<sup>1</sup>H-NMR (500 MHz, CD<sub>3</sub>CN)

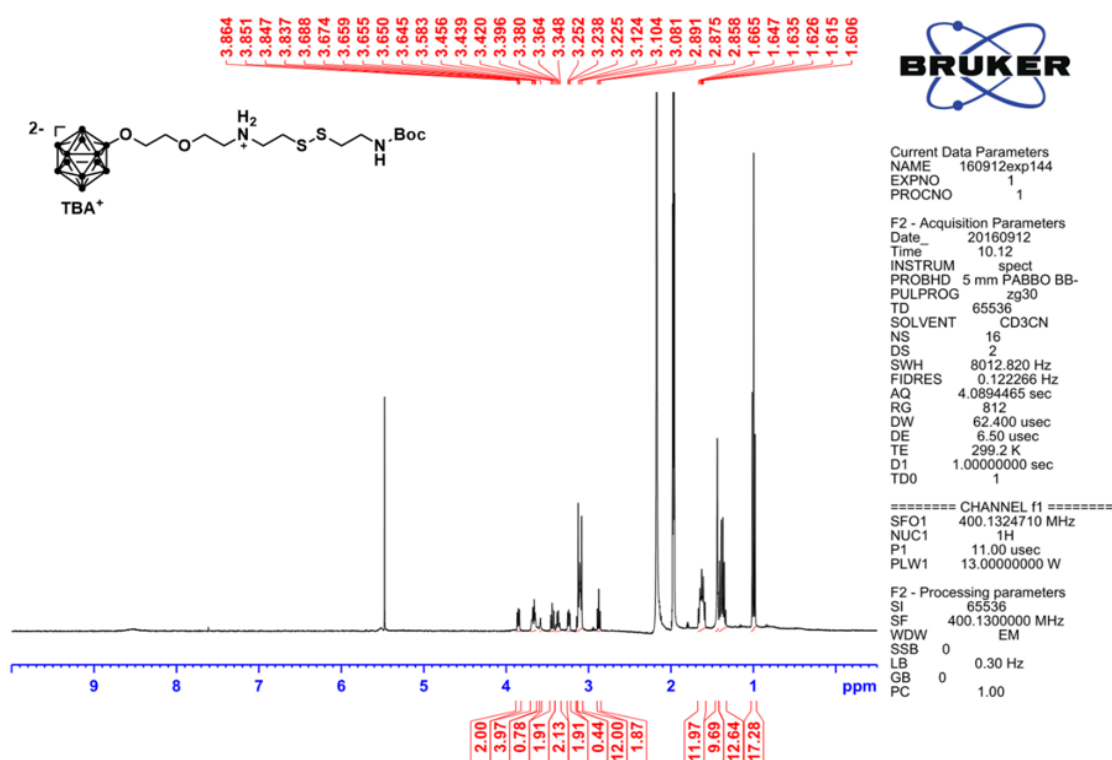

<sup>13</sup>C-NMR (125 MHz, CD<sub>3</sub>CN)

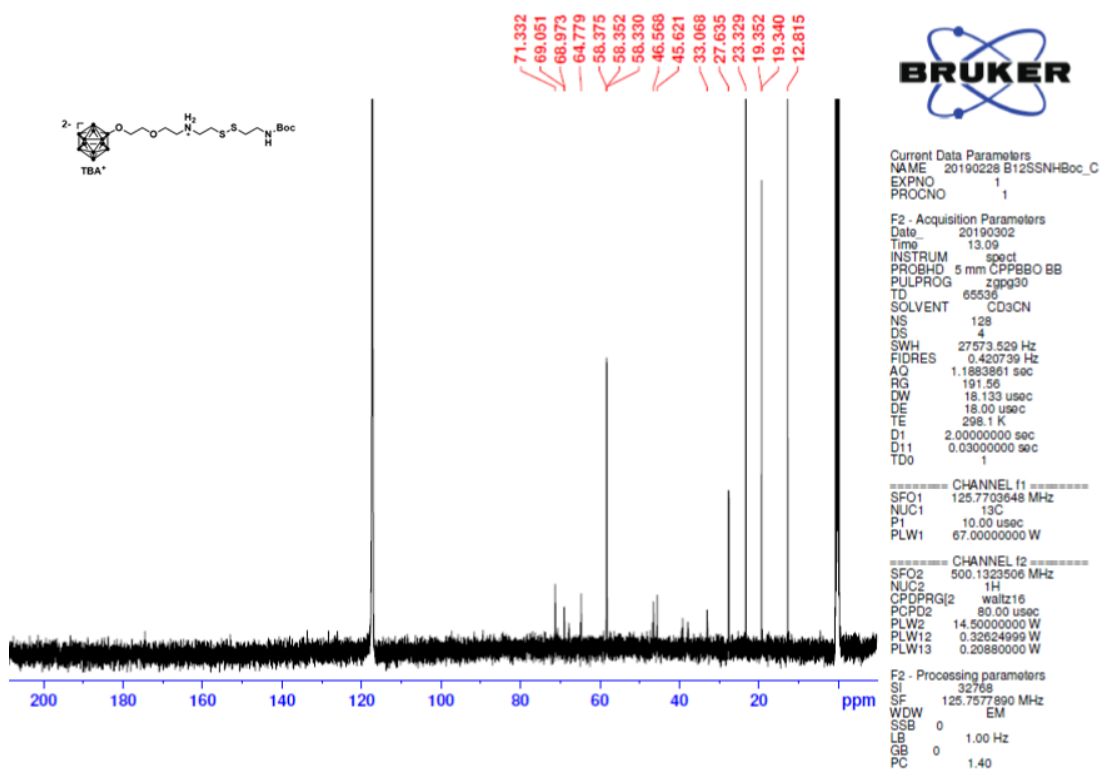

<sup>11</sup>B-NMR (160 MHz, CD<sub>3</sub>CN)

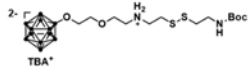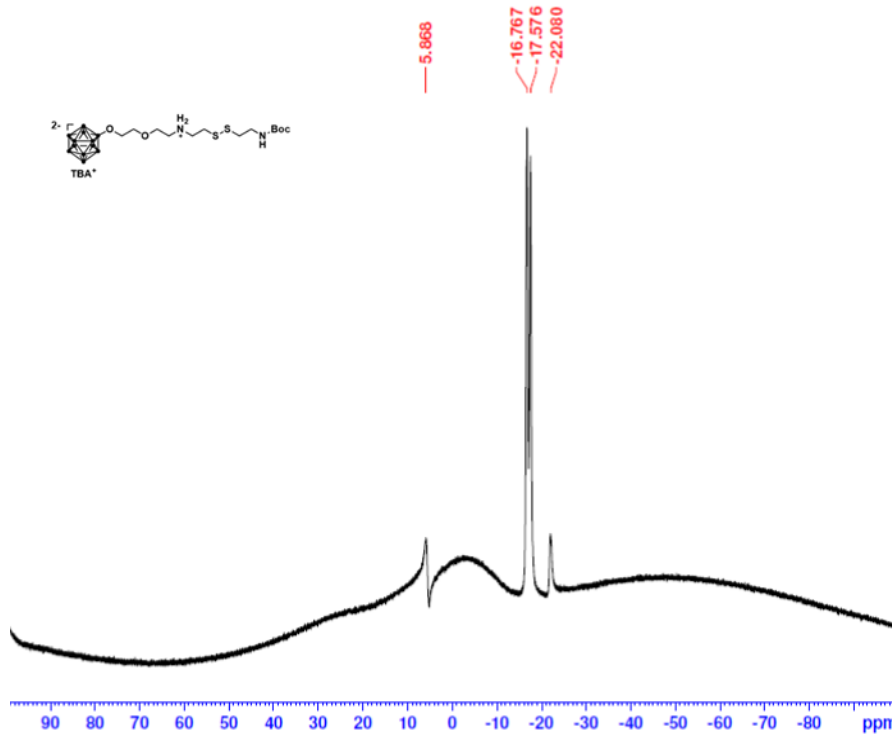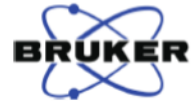

Current Data Parameters  
 NAME 20190228 B12SSNHoc\_B  
 EXPNO 1  
 PROCNO 1

F2 - Acquisition Parameters  
 Date\_ 20190302  
 Time\_ 13.14  
 INSTRUM spect  
 PROBHD 5 mm CPPBBO BB  
 PULPROG zgpg30  
 TD 65536  
 SOLVENT CD3CN  
 NS 21  
 DS 4  
 SWH 32051.281 Hz  
 FIDRES 0.489064 Hz  
 AQ 1.0223616 sec  
 RG 191.56  
 DW 15.600 usec  
 DE 18.00 usec  
 TE 298.2 K  
 D1 1.00000000 sec  
 D11 0.03000000 sec  
 TDO 1

===== CHANNEL f1 =====  
 SFO1 160.4615790 MHz  
 NUC1 1H  
 P1 11.93 usec  
 PLW1 67.00000000 W

===== CHANNEL f2 =====  
 SFO2 500.1323506 MHz  
 NUC2 1H  
 CPDPRG2 waltz16  
 PCPD2 80.00 usec  
 PLW2 14.50000000 W  
 PLW12 0.32624999 W  
 PLW13 0.20880000 W

F2 - Processing parameters  
 SI 32768  
 SF 160.4615790 MHz  
 WDW EM  
 SSB 0  
 LB 1.00 Hz  
 GB 0  
 PC 1.40



# Tetrabutylammonium form of maleimide-cystamine-*closo*-dodecaborate conjugate (6)

<sup>1</sup>H-NMR (500 MHz, CD<sub>3</sub>CN)

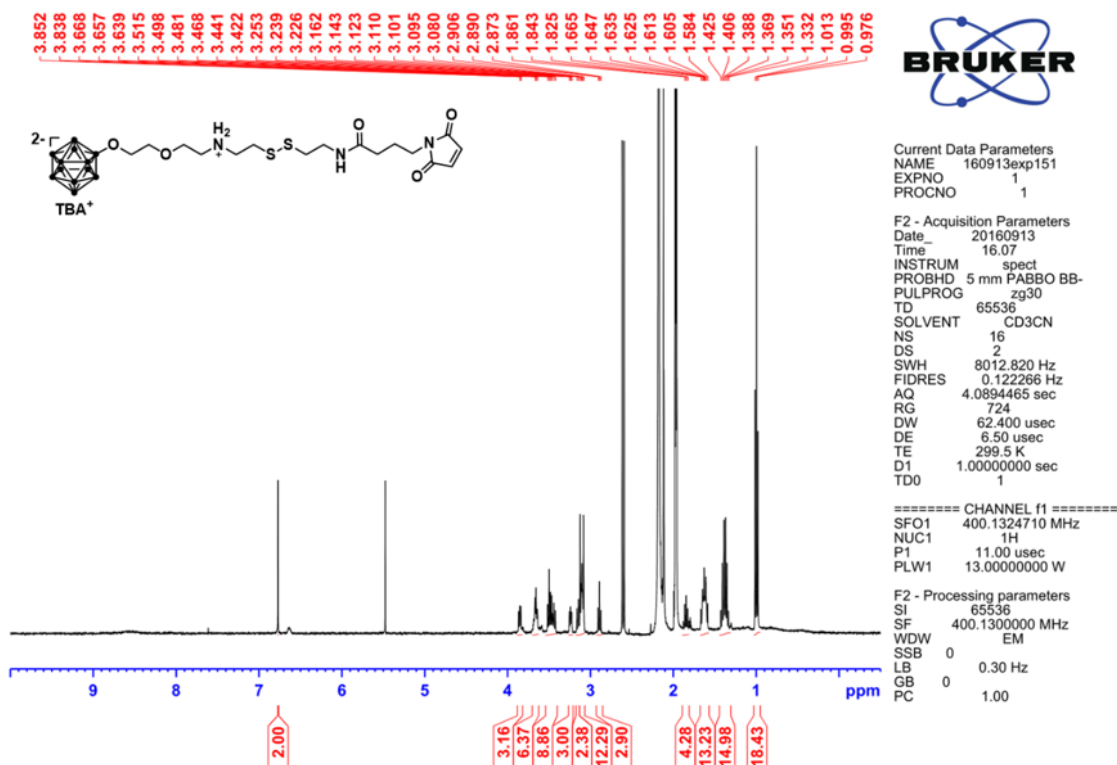

<sup>13</sup>C-NMR (125 MHz, CD<sub>3</sub>CN)

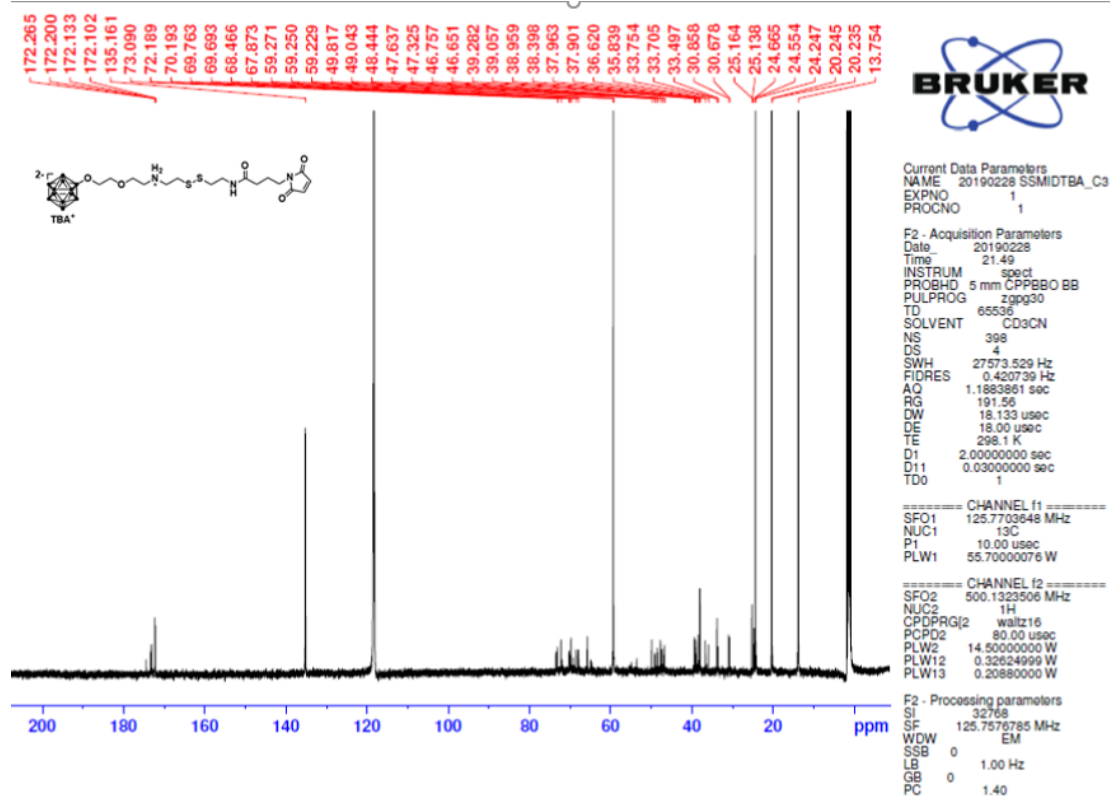

<sup>11</sup>B-NMR (160 MHz, CD<sub>3</sub>CN)

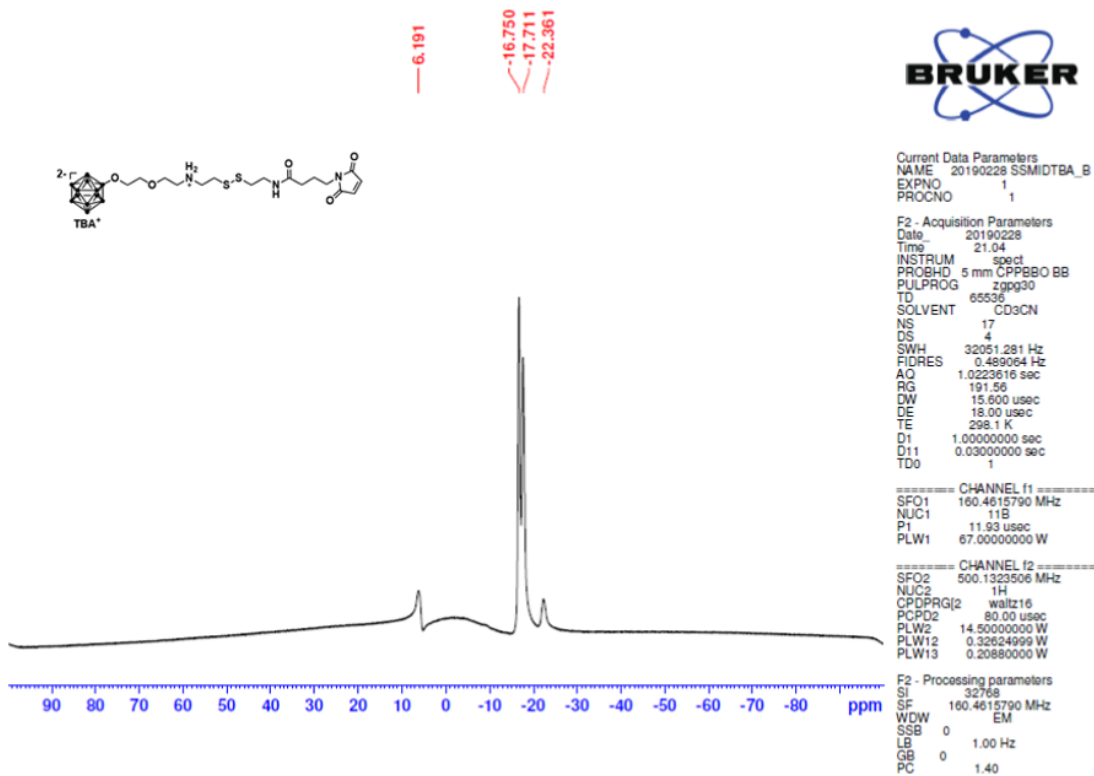

**Tetramethylammonium form of maleimide-cystamine-closo-dodecaborate conjugate (SSMID): <sup>1</sup>H-NMR (500 MHz, CD<sub>3</sub>CN)**

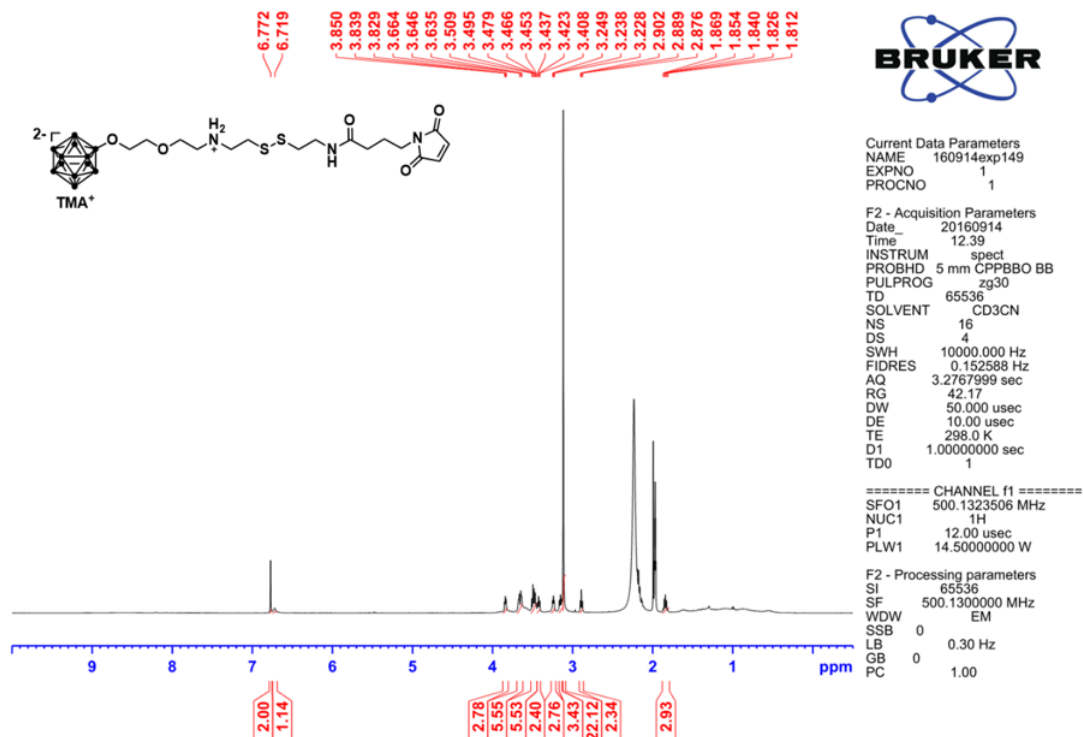

<sup>13</sup>C-NMR (125 MHz, CD<sub>3</sub>CN)

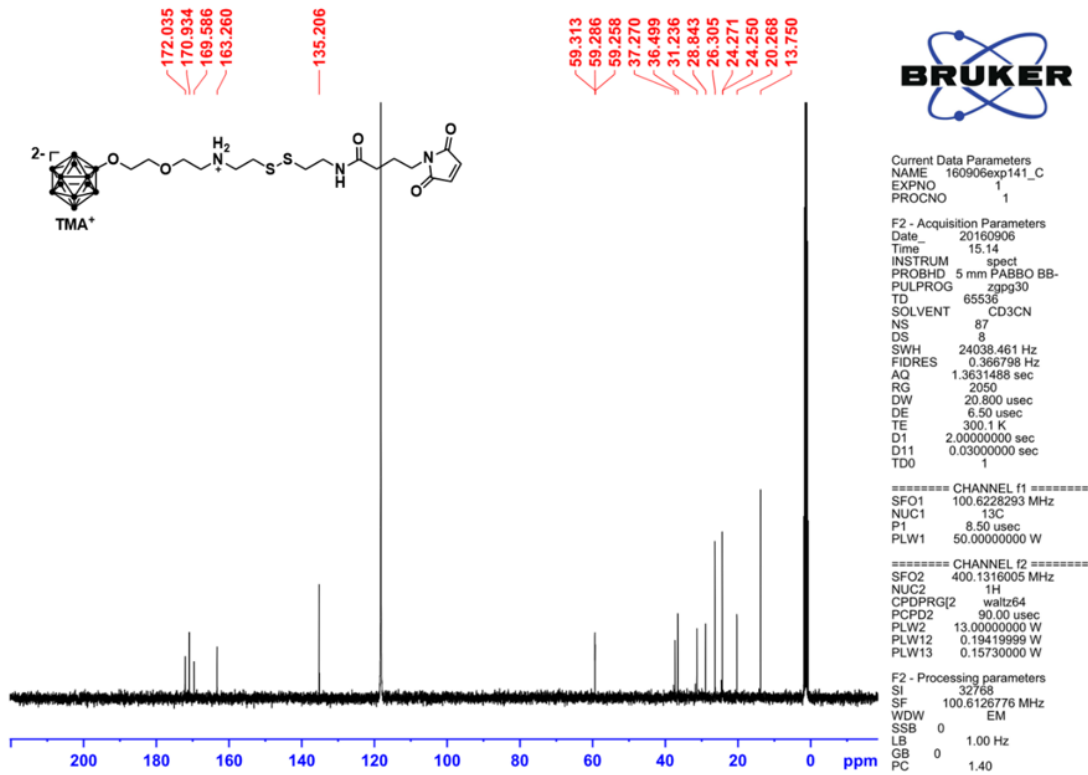

<sup>11</sup>B-NMR (160 MHz, CD<sub>3</sub>CN)

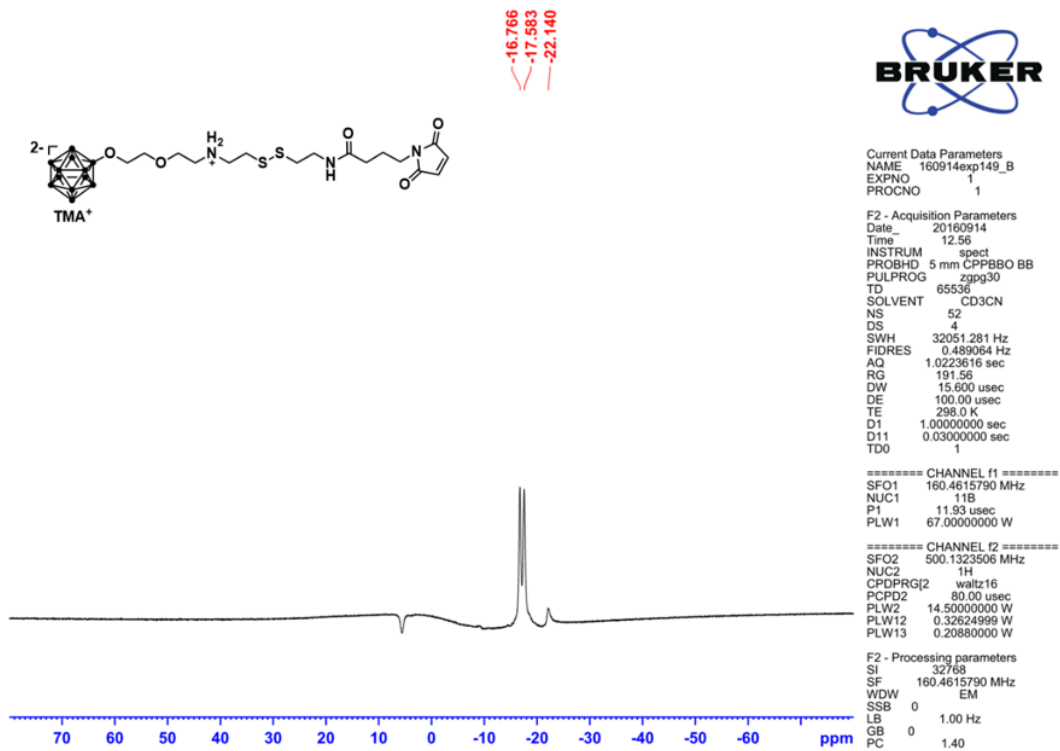

Supplement: c9ob00584f1.pdf [file c9ob00584f1.pdf]
